# Supplementary material for: On the nature of high-spin forms in the S2 state of the oxygen-evolving complex
Source: Royal Society of Chemistry journal article supplement (doi:10.1039/d4sc07818g), 2025-01-01
Supplement: d4sc07818g1.pdf [file d4sc07818g1.pdf]

# On the Nature of High-Spin Forms in the S<sub>2</sub> State of the Oxygen-Evolving Complex

*Markella Alikı Mermigki, Maria Drosou, Dimitrios A. Pantazis\**

Max-Planck-Institut für Kohlenforschung, Kaiser-Wilhelm-Platz 1, 45470 Mülheim an der Ruhr, Germany

---

**ELECTRONIC SUPPLEMENTARY INFORMATION**

---

**Table S1.** Selected interatomic distances (Å) for the set of optimizations where the QM1 region was optimized while keeping all atoms of the QM2 region constrained.

|           | Mn1-Mn2 | Mn2-Mn3 | Mn3-Mn4 | Mn1-Mn3 | Mn1-Mn4 | Mn1-Ca | Mn2-Ca | Mn3-Ca | Mn4-Ca |
|-----------|---------|---------|---------|---------|---------|--------|--------|--------|--------|
| <b>Q0</b> | 2.741   | 2.733   | 2.710   | 3.248   | 4.851   | 3.497  | 3.316  | 3.536  | 4.002  |
| <b>Q1</b> | 2.729   | 2.719   | 2.705   | 3.213   | 4.737   | 3.519  | 3.339  | 3.513  | 3.885  |
| <b>Q2</b> | 2.733   | 2.708   | 2.702   | 3.215   | 4.733   | 3.506  | 3.414  | 3.627  | 3.960  |
| <b>Q3</b> | 2.734   | 2.717   | 2.697   | 3.235   | 4.778   | 3.474  | 3.403  | 3.590  | 3.906  |
| <b>Q4</b> | 2.733   | 2.718   | 2.699   | 3.238   | 4.775   | 3.472  | 3.404  | 3.588  | 3.892  |
| <b>Q5</b> | 2.731   | 2.717   | 2.700   | 3.239   | 4.765   | 3.474  | 3.401  | 3.597  | 3.895  |

**Table S2.** Selected interatomic distances (Å) for the set of optimizations where both the QM1 region and the structurally active part of the QM2 region (605 atoms in total) were simultaneously optimized.

|           | Mn1-Mn2 | Mn2-Mn3 | Mn3-Mn4 | Mn1-Mn3 | Mn1-Mn4 | Mn1-Ca | Mn2-Ca | Mn3-Ca | Mn4-Ca |
|-----------|---------|---------|---------|---------|---------|--------|--------|--------|--------|
| <b>Q0</b> | 2.716   | 2.727   | 2.696   | 3.209   | 4.716   | 3.478  | 3.290  | 3.535  | 3.919  |
| <b>Q1</b> | 2.723   | 2.722   | 2.700   | 3.198   | 4.708   | 3.513  | 3.346  | 3.556  | 3.883  |
| <b>Q2</b> | 2.732   | 2.717   | 2.698   | 3.200   | 4.703   | 3.482  | 3.394  | 3.624  | 3.908  |
| <b>Q3</b> | 2.730   | 2.723   | 2.700   | 3.216   | 4.766   | 3.462  | 3.383  | 3.577  | 3.867  |
| <b>Q4</b> | 2.729   | 2.723   | 2.701   | 3.221   | 4.767   | 3.458  | 3.385  | 3.579  | 3.861  |
| <b>Q5</b> | 2.731   | 2.723   | 2.702   | 3.224   | 4.759   | 3.456  | 3.393  | 3.593  | 3.868  |

**Table S3.** Mulliken spin populations on Mn ions for the set of optimizations where the QM1 region was optimized while keeping all atoms of the QM2 region constrained.

|           | Mn1  | Mn2  | Mn3  | Mn4  |
|-----------|------|------|------|------|
| <b>Q0</b> | 3.92 | 2.97 | 2.94 | 2.91 |
| <b>Q1</b> | 3.91 | 2.95 | 2.94 | 2.95 |
| <b>Q2</b> | 3.90 | 2.95 | 2.93 | 2.96 |
| <b>Q3</b> | 3.91 | 2.96 | 2.95 | 2.96 |
| <b>Q4</b> | 3.91 | 2.96 | 2.95 | 2.96 |
| <b>Q5</b> | 3.90 | 2.96 | 2.96 | 2.96 |

**Table S4.** Mulliken spin populations on Mn ions for the set of optimizations where both the QM1 region and the structurally active part of the QM2 region were simultaneously optimized.

|           | Mn1  | Mn2  | Mn3  | Mn4  |
|-----------|------|------|------|------|
| <b>Q0</b> | 3.89 | 2.96 | 2.94 | 2.91 |
| <b>Q1</b> | 3.88 | 2.95 | 2.95 | 2.95 |
| <b>Q2</b> | 3.88 | 2.95 | 2.94 | 2.96 |
| <b>Q3</b> | 3.89 | 2.95 | 2.96 | 2.95 |
| <b>Q4</b> | 3.89 | 2.95 | 2.96 | 2.96 |
| <b>Q5</b> | 3.89 | 2.95 | 2.96 | 2.95 |

**Table S5.** BS-TPSSh calculated pairwise Mn-Mn exchange coupling constants  $J_{ij}$  ( $\text{cm}^{-1}$ ) and energy differences between the ground and the first excited state ( $\text{cm}^{-1}$ ) for the set of optimizations where the QM1 region was optimized while keeping all atoms of the QM2 region constrained.

|           | $J_{12}$ | $J_{13}$ | $J_{14}$ | $J_{23}$ | $J_{24}$ | $J_{34}$ | $\Delta E_{\text{ES-GS}}$ |
|-----------|----------|----------|----------|----------|----------|----------|---------------------------|
| <b>Q0</b> | -23      | 0        | 9        | 16       | 3        | -28      | 41.3                      |
| <b>Q1</b> | -21      | 1        | 9        | 20       | 3        | -15      | 26.9                      |
| <b>Q2</b> | -21      | 0        | 8        | 15       | 2        | -15      | 28.3                      |
| <b>Q3</b> | -21      | 2        | 7        | 17       | 2        | -13      | 24.0                      |
| <b>Q4</b> | -21      | 2        | 7        | 17       | 2        | -13      | 24.0                      |
| <b>Q5</b> | -21      | 2        | 7        | 17       | 2        | -13      | 24.0                      |

**Table S6.** BS-TPSSh/xTB calculated exchange coupling constants  $J_{ij}$  ( $\text{cm}^{-1}$ ) and energy differences between the ground and the first excited state ( $\text{cm}^{-1}$ ) for the set of optimizations where the QM1 region was optimized while keeping all atoms of the QM2 region constrained.

|           | $J_{12}$ | $J_{13}$ | $J_{14}$ | $J_{23}$ | $J_{24}$ | $J_{34}$ | $\Delta E_{\text{ES-GS}}$ |
|-----------|----------|----------|----------|----------|----------|----------|---------------------------|
| <b>Q0</b> | -22      | -1       | 8        | 15       | 3        | -21      | 35.7                      |
| <b>Q1</b> | -22      | 1        | 10       | 18       | 3        | -14      | 26.4                      |
| <b>Q2</b> | -22      | 0        | 10       | 15       | 2        | -14      | 27.1                      |
| <b>Q3</b> | -21      | 1        | 8        | 16       | 2        | -13      | 25.0                      |
| <b>Q4</b> | -21      | 1        | 8        | 16       | 2        | -13      | 25.7                      |
| <b>Q5</b> | -21      | 2        | 9        | 16       | 2        | -13      | 24.2                      |

**Table S7.** BS-TPSSh/xTB calculated exchange coupling constants  $J_{ij}$  ( $\text{cm}^{-1}$ ) and energy differences between the ground and the first excited state ( $\text{cm}^{-1}$ ) for the set of optimizations where both the QM1 region and the structurally active part of the QM2 region were simultaneously optimized.

|           | $J_{12}$ | $J_{13}$ | $J_{14}$ | $J_{23}$ | $J_{24}$ | $J_{34}$ | $\Delta E_{\text{ES-GS}}$ |
|-----------|----------|----------|----------|----------|----------|----------|---------------------------|
| <b>Q0</b> | -23      | 1        | 15       | 19       | 3        | -19      | 32.1                      |
| <b>Q1</b> | -18      | 0        | 9        | 25       | 6        | -18      | 25.5                      |
| <b>Q2</b> | -20      | 2        | 12       | 18       | 2        | -13      | 23.6                      |
| <b>Q3</b> | -21      | 1        | 9        | 17       | 2        | -12      | 23.4                      |
| <b>Q4</b> | -22      | 1        | 10       | 17       | 3        | -12      | 23.6                      |
| <b>Q5</b> | -21      | 2        | 10       | 17       | 2        | -10      | 21.0                      |

**Table S8.** Computed “raw” hyperfine coupling constants  $A_{\text{iso,BS}}$  (MHz) for all four Mn ions for the set of optimizations where the QM1 region was optimized while keeping all atoms of the QM2 region constrained.

|           | Mn1  | Mn2 | Mn3 | Mn4  |
|-----------|------|-----|-----|------|
| <b>Q0</b> | -399 | 406 | 427 | -462 |
| <b>Q1</b> | -426 | 416 | 425 | -477 |
| <b>Q2</b> | -430 | 415 | 425 | -477 |
| <b>Q3</b> | -436 | 412 | 419 | -477 |
| <b>Q4</b> | -436 | 412 | 419 | -475 |
| <b>Q5</b> | -433 | 411 | 420 | -473 |

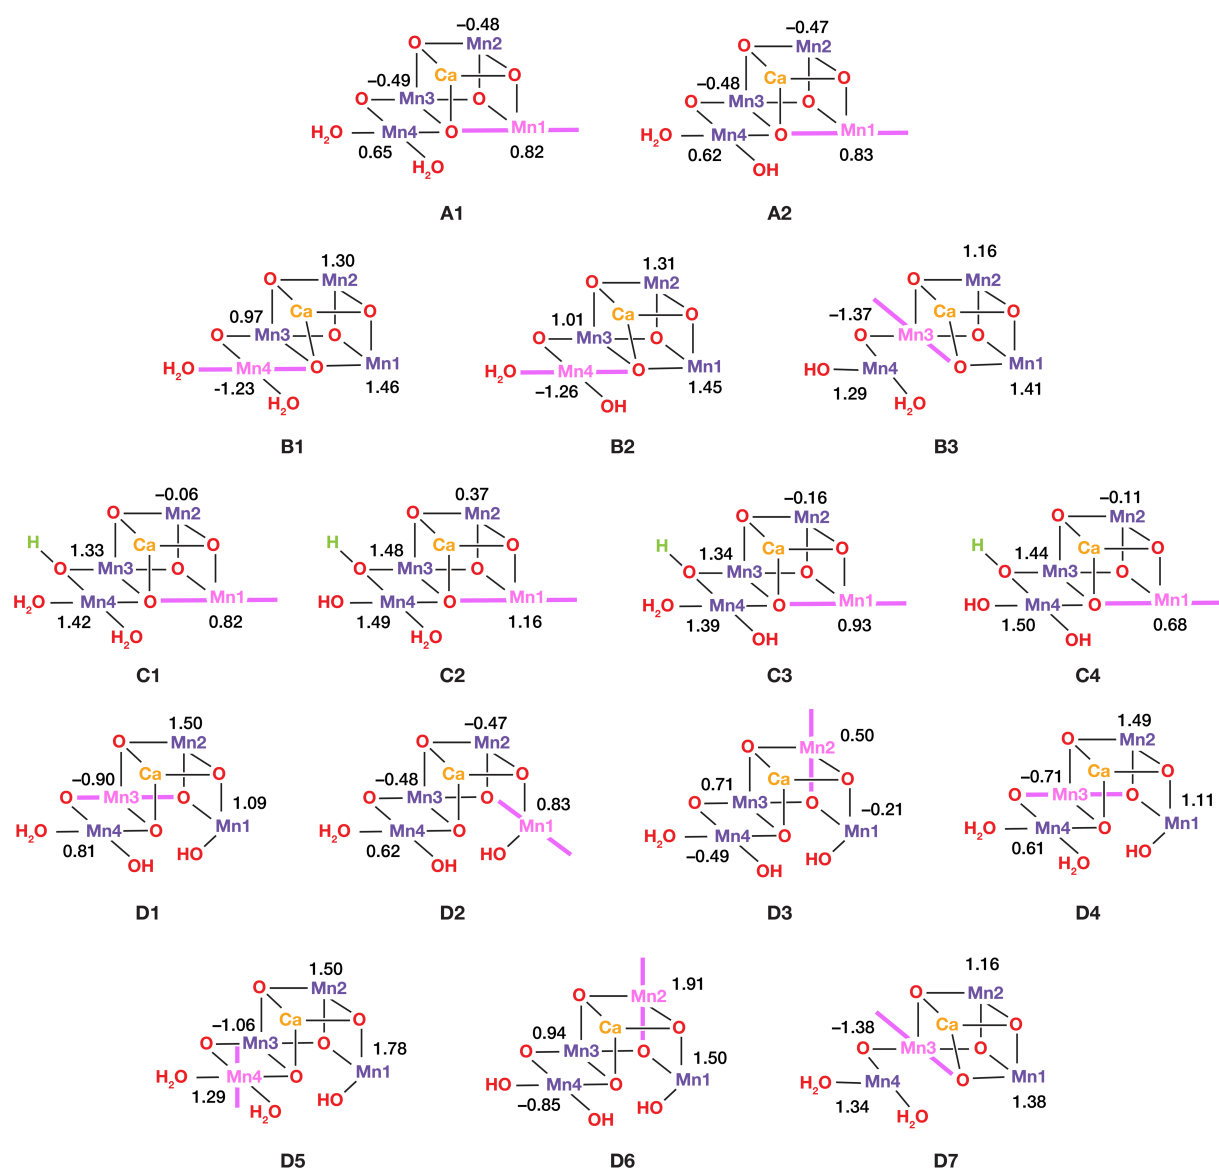

**Figure S1.** Structure of all  $S_2$  models with the expectation values of the site-spin operators of each Mn ion  $i$ ,  $\langle S_z^i \rangle$ . The Mn(III) ions are shown in pink and Mn(IV) ions in purple. The pseudo-Jahn-Teller axes of Mn(III) ions are indicated with bold pink lines.

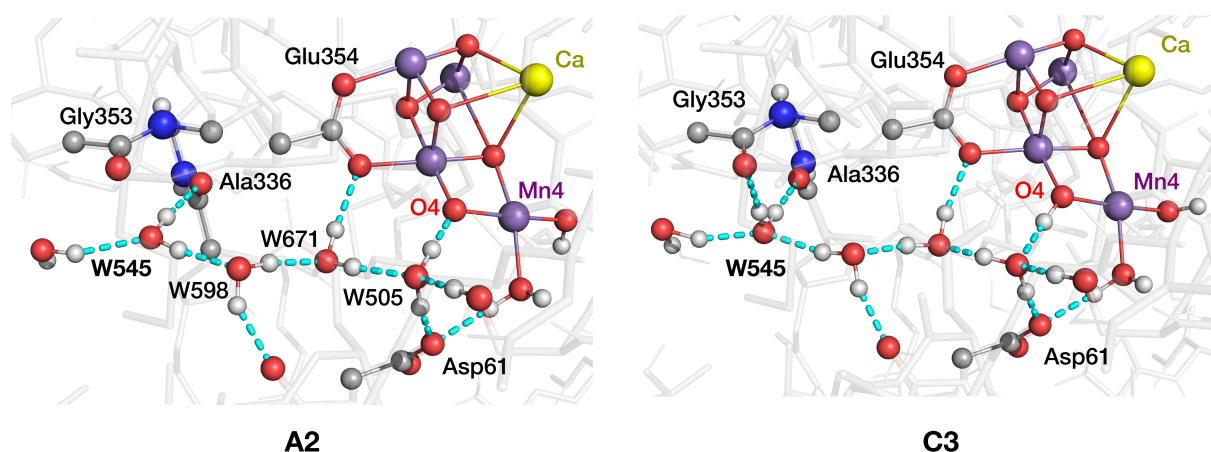

**Figure S2.** Comparison of the hydrogen bonding networks of the low-spin model **A2** and the high-spin model **C3** with protonated O4 oxo-bridge showing the differences in the O4 channel hydrogen bonds. When O4 is not protonated, the crystallographic water molecule W505 forms a hydrogen bond with O4 and with the carbonyl oxygen of Asp61. Moreover, W545 forms a hydrogen bond with the carbonyl oxygen of Ala336 and is close (3.2 Å) to Gly353 without forming a hydrogen bond. Upon O4 protonation, the direction of the W505 proton changes from O4 to W671. In response to this, the directions of the protons connecting water molecules W545 and W598 are expected to change as well, and W545 can now form hydrogen bonds with the carbonyl oxygen atoms of both Ala336 and Gly353.

**Table S9.** Mulliken spin populations (TPSSh) on the Mn ions of all optimized S<sub>2</sub> state models.

|           | Mn1   | Mn2   | Mn3   | Mn4   |
|-----------|-------|-------|-------|-------|
| <b>A1</b> | 3.910 | 2.960 | 2.957 | 2.956 |
| <b>A2</b> | 3.902 | 2.937 | 2.902 | 2.928 |
| <b>B1</b> | 2.961 | 2.921 | 2.905 | 3.948 |
| <b>B2</b> | 2.971 | 2.912 | 2.882 | 3.897 |
| <b>B3</b> | 2.954 | 2.934 | 3.763 | 2.922 |
| <b>C1</b> | 3.924 | 2.964 | 2.987 | 2.989 |
| <b>C2</b> | 3.930 | 2.948 | 2.934 | 2.906 |
| <b>C3</b> | 3.926 | 2.956 | 2.973 | 2.947 |
| <b>C4</b> | 3.917 | 2.924 | 2.936 | 2.984 |
| <b>D1</b> | 2.974 | 3.023 | 3.795 | 2.926 |
| <b>D2</b> | 3.883 | 2.985 | 2.961 | 2.926 |
| <b>D3</b> | 2.965 | 3.863 | 2.944 | 2.923 |
| <b>D4</b> | 2.965 | 3.863 | 2.944 | 2.923 |
| <b>D5</b> | 3.033 | 2.977 | 3.816 | 2.882 |
| <b>D6</b> | 2.928 | 2.948 | 2.906 | 3.875 |
| <b>D7</b> | 3.032 | 2.923 | 3.795 | 2.908 |

**Table S10.** Relative energies (in kcal/mol) per group of isomers of the  $S_2$  variants, calculated with B3LYP/xTB and DLPNO-CCSD(T)/xTB using the “QM1” region of ca. 130 atoms defined in Section 2.2, as well as the “QM4” region of ca. 260 atoms using different functionals (B3LYP, B3LYP\* and TPSSh). For each methodology the energy differences of both QM/xTB and isolated QM are noted.

|           | B3LYP (Q1) |      | DLPNO (Q1) |      | B3LYP (Q4) |      | B3LYP* (Q4) |      | TPSSh (Q4) |      |
|-----------|------------|------|------------|------|------------|------|-------------|------|------------|------|
|           | QM/<br>xTB | QM   | QM/<br>xTB | QM   | QM/<br>xTB | QM   | QM/<br>xTB  | QM   | QM/<br>xTB | QM   |
| <b>A1</b> | 0.0        | 0.0  | 0.0        | 0.0  | 0.0        | 0.0  | 0.0         | 0.0  | 0.0        | 0.0  |
| <b>B1</b> | 3.4        | 1.5  | -1.2       | -2.9 | 5.5        | 2.6  | 5.6         | 2.7  | 4.9        | 2.0  |
| <b>C2</b> | 33.0       | 24.3 | 35.7       | 27.1 | 32.4       | 21.6 | 32.5        | 21.7 | 32.3       | 21.5 |
| <b>C3</b> | 24.8       | 17.1 | 30.2       | 22.5 | 24.2       | 8.1  | 24.3        | 8.1  | 24.9       | 8.7  |
| <b>A2</b> | 0.0        | 0.0  | 0.0        | 0.0  | 0.0        | 0.0  | 0.0         | 0.0  | 0.0        | 0.0  |
| <b>B2</b> | -1.0       | 0.5  | -6.6       | -5.0 | 1.6        | 3.7  | 1.3         | 3.4  | 0.9        | 3.1  |
| <b>B3</b> | 2.2        | 21.5 | -3.2       | 16.1 | 2.6        | 23.6 | 2.4         | 23.3 | 2.0        | 23.0 |
| <b>C4</b> | 29.6       | 28.6 | 31.1       | 30.2 | 30.9       | 16.9 | 31.7        | 17.7 | 30.2       | 16.2 |

**Table S11.** Calculated exchange coupling constants  $J_{ij}$  ( $\text{cm}^{-1}$ ), ground spin state ( $S_{\text{GS}}$ ), first excited spin state ( $S_{\text{ES}}$ ), and their energy separation  $\Delta E_{\text{GS-ES}}$  ( $\text{cm}^{-1}$ ) for selected models of the  $S_2$  state with protonated and neutral His337.

|           |                            | $J_{12}$ | $J_{13}$ | $J_{14}$ | $J_{23}$ | $J_{24}$ | $J_{34}$ | $S_{\text{GS}}$ | $S_{\text{ES}}$ | $\Delta E_{\text{ES-GS}}$ |
|-----------|----------------------------|----------|----------|----------|----------|----------|----------|-----------------|-----------------|---------------------------|
| <b>A2</b> | <b>His337<sup>+1</sup></b> | -27      | 4        | 8        | 13       | 2        | -12      | 1/2             | 3/2             | 24.1                      |
|           | <b>His337<sup>0</sup></b>  | -28      | 4        | 9        | 14       | 3        | -13      | 1/2             | 3/2             | 24.0                      |
| <b>B2</b> | <b>His337<sup>+1</sup></b> | 27       | 11       | 9        | 27       | 1        | -22      | 5/2             | 7/2             | 3.6                       |
|           | <b>His337<sup>0</sup></b>  | 27       | 8        | 13       | 28       | 1        | -20      | <u>7/2</u>      | 5/2             | 10.0                      |
| <b>C4</b> | <b>His337<sup>+1</sup></b> | -28      | 17       | 4        | 26       | 0        | 9        | 7/2             | 9/2             | 12.4                      |
|           | <b>His337<sup>0</sup></b>  | -31      | 19       | 5        | 28       | 1        | 10       | 7/2             | 9/2             | 13.4                      |
| <b>D1</b> | <b>His337<sup>+1</sup></b> | 19       | -39      | -3       | 14       | 6        | -51      | 5/2             | 3/2             | 53.1                      |
|           | <b>His337<sup>0</sup></b>  | 19       | -36      | -2       | 10       | 5        | -49      | 5/2             | 3/2             | 71.3                      |

**Table S12.** Calculated His332  $^{14}\text{N}$  unprojected (“raw”) isotropic hyperfine coupling constants ( $A_{\text{BS,iso}}$  MHz), the site isotropic coupling constant ( $a_{\text{iso,site}}$  MHz) and the Anisotropy of the NQI Tensors (MHz).

|           | $ A_{\text{BS,iso}} $ | $ a_{\text{iso}} ^1$ | $ e^{2\text{Qq/h}} $ | $\eta$ |
|-----------|-----------------------|----------------------|----------------------|--------|
| <b>A1</b> | 12.5                  | 3.1                  | 2.04                 | 0.99   |
| <b>A2</b> | 11.8                  | 3.0                  | 2.12                 | 0.60   |
| <b>B1</b> | 1.1                   | 1.8                  | 1.87                 | 0.94   |
| <b>B2</b> | 1.0                   | 1.7                  | 1.95                 | 0.93   |
| <b>B3</b> | 0.7                   | 1.1                  | 2.09                 | 0.82   |
| <b>C1</b> | 13.1                  | 3.3                  | 1.99                 | 0.88   |
| <b>C2</b> | 1.7                   | 3.1                  | 2.04                 | 0.97   |
| <b>C3</b> | 1.8                   | 3.1                  | 1.98                 | 0.97   |
| <b>C4</b> | 1.6                   | 2.8                  | 2.09                 | 0.89   |
| <b>D1</b> | 1.2                   | 1.9                  | 2.20                 | 0.73   |
| <b>D2</b> | 0.5                   | 0.9                  | 2.49                 | 0.57   |
| <b>D4</b> | 1.2                   | 1.9                  | 2.05                 | 0.85   |
| <b>D5</b> | 0.7                   | 1.7                  | 1.98                 | 0.89   |
| <b>D6</b> | 0.6                   | 1.4                  | 2.42                 | 0.58   |
| <b>D7</b> | 0.9                   | 1.5                  | 2.07                 | 0.85   |

<sup>1</sup>  $|a_{\text{iso}}| = |A_{\text{BS,iso}}| \cdot \frac{\langle S_z \rangle_{\text{BS}}}{S_i}$  where  $|A_{\text{BS,iso}}|$  is the raw calculated hyperfine coupling constant,  $\langle S_z \rangle_{\text{BS}}$  is the total spin  $M_S$  of the BS determinant and  $S_i$  the site-spin of the coordinating Mn ion.

**Table S13.** BS-DFT calculated spin expectation values  $\langle S_z^i \rangle$  for the Mn ions of all  $S_2$  state models.

|           | Mn1   | Mn2    | Mn3    | Mn4    |
|-----------|-------|--------|--------|--------|
| <b>A1</b> | 0.822 | -0.477 | -0.490 | 0.646  |
| <b>A2</b> | 0.832 | -0.471 | -0.477 | 0.616  |
| <b>B1</b> | 1.460 | 1.298  | 0.970  | -1.229 |
| <b>B2</b> | 1.451 | 1.305  | 1.005  | -1.261 |
| <b>B3</b> | 1.414 | 1.164  | -1.369 | 1.291  |
| <b>C1</b> | 0.822 | -0.064 | 1.326  | 1.416  |
| <b>C2</b> | 1.162 | 0.369  | 1.479  | 1.490  |
| <b>C3</b> | 0.896 | -0.182 | 1.367  | 1.419  |
| <b>C4</b> | 0.888 | -0.322 | 1.455  | 1.478  |
| <b>D1</b> | 1.085 | 1.499  | -0.895 | 0.811  |
| <b>D2</b> | 1.780 | 1.495  | -1.062 | 1.287  |
| <b>D4</b> | 1.112 | 1.493  | -0.713 | 0.609  |
| <b>D5</b> | 1.495 | 1.500  | -0.588 | 1.093  |
| <b>D6</b> | 1.499 | 1.911  | 0.943  | -0.853 |
| <b>D7</b> | 1.380 | 1.164  | -1.384 | 1.341  |



**Table S14.** Spin-projection factors ( $\rho_i$ ) of all Mn ions of the S<sub>2</sub> state models.

|           | Mn1   | Mn2    | Mn3    | Mn4    |
|-----------|-------|--------|--------|--------|
| <b>A1</b> | 1.644 | -0.955 | -0.981 | 1.292  |
| <b>A2</b> | 1.663 | -0.942 | -0.954 | 1.233  |
| <b>B1</b> | 0.584 | 0.519  | 0.388  | -0.492 |
| <b>B2</b> | 0.580 | 0.522  | 0.402  | -0.504 |
| <b>B3</b> | 0.566 | 0.466  | -0.548 | 0.517  |
| <b>C1</b> | 0.234 | -0.017 | 0.379  | 0.406  |
| <b>C2</b> | 0.258 | 0.082  | 0.255  | 0.331  |
| <b>C3</b> | 0.256 | -0.052 | 0.391  | 0.405  |
| <b>C4</b> | 0.254 | -0.092 | 0.416  | 0.422  |
| <b>D1</b> | 0.432 | 0.600  | -0.356 | 0.324  |
| <b>D2</b> | 0.509 | 0.426  | -0.303 | 0.366  |
| <b>D4</b> | 0.445 | 0.597  | -0.285 | 0.244  |
| <b>D5</b> | 0.427 | 0.428  | -0.168 | 0.312  |
| <b>D6</b> | 0.429 | 0.546  | 0.269  | -0.243 |
| <b>D7</b> | 0.552 | 0.465  | -0.554 | 0.536  |

**Table S15.** Raw calculated hyperfine coupling constants  $A_{\text{iso,BS}}$  (MHz) for all four Mn ions for all high-spin variations.

|           | Mn1  | Mn2 | Mn3 | Mn4  |
|-----------|------|-----|-----|------|
| <b>A1</b> | -441 | 410 | 416 | -477 |
| <b>A2</b> | -455 | 428 | 377 | -472 |
| <b>B1</b> | -65  | -65 | -62 | 81   |
| <b>B2</b> | -65  | -66 | -60 | 92   |
| <b>B3</b> | -72  | -76 | 132 | -78  |
| <b>C1</b> | -420 | 391 | 400 | -460 |
| <b>C2</b> | -57  | 70  | -62 | -58  |
| <b>C3</b> | -56  | 70  | -60 | -55  |
| <b>C4</b> | -69  | 70  | -63 | -59  |
| <b>D1</b> | 119  | -94 | 119 | -94  |
| <b>D2</b> | -70  | -62 | 69  | -68  |
| <b>D4</b> | -69  | -74 | 124 | -90  |
| <b>D5</b> | -51  | -54 | 68  | -97  |
| <b>D6</b> | 70   | -69 | -50 | 70   |
| <b>D7</b> | -71  | -75 | 133 | -84  |

**Table S16.** Local isotropic  $^{55}\text{Mn}$  hyperfine coupling constants  $a_{\text{iso}}$  (MHz) for all  $\text{S}_2$  models.

|           | $a_{1,\text{iso}}$ | $a_{2,\text{iso}}$ | $a_{3,\text{iso}}$ | $a_{4,\text{iso}}$ |
|-----------|--------------------|--------------------|--------------------|--------------------|
| <b>A1</b> | -196               | 243                | 247                | -283               |
| <b>A2</b> | -203               | 254                | 224                | -280               |
| <b>B1</b> | -194               | -194               | -184               | 181                |
| <b>B2</b> | -192               | -195               | -178               | 205                |
| <b>B3</b> | -213               | -225               | 294                | -230               |
| <b>C1</b> | -187               | 232                | 237                | -273               |
| <b>C2</b> | -177               | 292                | -259               | -241               |
| <b>C3</b> | -190               | 237                | 223                | -268               |
| <b>C4</b> | 241                | -241               | -212               | -245               |
| <b>D1</b> | 352                | -278               | 264                | -278               |
| <b>D2</b> | -217               | -257               | 287                | -281               |
| <b>D4</b> | -204               | -221               | 276                | -267               |
| <b>D5</b> | -210               | -225               | 283                | -304               |
| <b>D6</b> | 291                | -214               | -208               | 291                |
| <b>D7</b> | -212               | -223               | 296                | -249               |

**Table S17.** Experimental and calculated  $^{55}\text{Mn}$  projected and scaled isotropic hyperfine coupling constants ( $|A_{\text{iso}}|$ , in MHz) for all  $S_2$  models arranged in the descending order ( $A_1 > A_2 > A_3 > A_4$ ) with the corresponding Mn ion indicated in square brackets, and the ratios  $A_1/A_2$ ,  $A_2/A_3$ ,  $A_3/A_4$ .

|             |                                   | $ A_{1,\text{iso}} $ | $ A_{2,\text{iso}} $ | $ A_{3,\text{iso}} $ | $ A_{4,\text{iso}} $ | $A_1/A_2$ | $A_2/A_3$ | $A_3/A_4$ |
|-------------|-----------------------------------|----------------------|----------------------|----------------------|----------------------|-----------|-----------|-----------|
| Calculation | <b>A1</b>                         | 366 [4]              | 322 [1]              | 242 [3]              | 232 [2]              | 1.14      | 1.33      | 1.04      |
|             | <b>A2</b>                         | 345 [4]              | 337 [1]              | 239 [2]              | 213 [3]              | 1.02      | 1.41      | 1.12      |
| Experiment  | <i>Synechocystis</i> <sup>1</sup> | 313                  | 302                  | 246                  | 210                  | 1.04      | 1.23      | 1.17      |
|             | <i>Spinach</i> <sup>1</sup>       | 368                  | 284                  | 244                  | 234                  | 1.30      | 1.16      | 1.04      |
|             | <i>T. vestitus</i> <sup>2</sup>   | 307                  | 209                  | 204                  | 190                  | 1.47      | 1.02      | 1.07      |
| Calculation | <b>B1</b>                         | 113 [1]              | 101                  | 89 [4]               | 71 [3]               | 1.12      | 1.13      | 1.24      |
|             | <b>B2</b>                         | 112 [1]              | 103 [4]              | 102 [2]              | 72 [3]               | 1.08      | 1.02      | 1.42      |
|             | <b>B3</b>                         | 161 [3]              | 120 [1]              | 119 [4]              | 105 [2]              | 1.34      | 1.01      | 1.13      |
|             | <b>C1</b>                         | 111 [4]              | 90 [3]               | 44 [1]               | 4 [2]                | 1.23      | 2.06      | 11.01     |
|             | <b>C2</b>                         | 80 [4]               | 66 [3]               | 46 [1]               | 24 [2]               | 1.20      | 1.45      | 1.90      |
|             | <b>C3</b>                         | 98 [3]               | 92 [4]               | 44 [1]               | 15 [2]               | 1.06      | 2.08      | 2.94      |
|             | <b>C4</b>                         | 109 [3]              | 103 [4]              | 54 [1]               | 27 [2]               | 1.05      | 1.91      | 2.02      |
|             | <b>D1</b>                         | 167 [2]              | 152 [1]              | 94 [3]               | 90 [4]               | 1.10      | 1.62      | 1.04      |
|             | <b>D2</b>                         | 111 [1]              | 109 [2]              | 103 [4]              | 87 [3]               | 1.01      | 1.06      | 1.18      |
|             | <b>D4</b>                         | 132 [2]              | 91 [1]               | 78 [3]               | 64 [4]               | 1.45      | 1.16      | 1.22      |
|             | <b>D5</b>                         | 96 [2]               | 95 [4]               | 90 [1]               | 48 [3]               | 1.02      | 1.06      | 1.88      |
|             | <b>D6</b>                         | 125 [1]              | 117 [2]              | 71 [4]               | 56 [3]               | 1.07      | 1.65      | 1.26      |
|             | <b>D7</b>                         | 164 [3]              | 134 [4]              | 117 [1]              | 104 [2]              | 1.23      | 1.14      | 1.13      |

The  $^{55}\text{Mn}$  projected and scaled isotropic hyperfine coupling constants are calculated using the well-established procedure:

$$|A_{i,\text{iso}}| = \left| \frac{A_{i,x} + A_{i,y} + A_{i,z}}{3} \right|$$

Where  $A_{i,x} = A_{x,\text{BS}} \cdot \frac{\langle S_z \rangle_{\text{BS}}}{S_i} \cdot \rho_i \cdot 1.78$ , and same for  $A_{i,y}$  and  $A_{i,z}$ .

$A_{x,\text{BS}}$  is the raw calculated Hyperfine Coupling Constant,  $\langle S_z \rangle_{\text{BS}}$  is the total spin  $M_S$  of the BS determinant,  $\rho_i$  is the spin projection coefficient of  $\text{Mn}_i$  and 1.78 is a scaling factor used for comparison of the calculated  $^{55}\text{Mn}$  hyperfine coupling constants with experimental results.

## Orca Input File Examples

### *DFT/xTB Geometry Optimizations*

```
! QM/XTB UKS B3LYP RIJCOSX ZORA ZORA-def2-TZVP(-f) D4 SARC/J
! KDIIS NoTrah TightSCF
! Opt

%pal nprocs 10 end
%maxcore 10000

%basis NewGTO C "ZORA-def2-SVP" end
      NewGTO H "ZORA-def2-SVP" end
end

%qmmm
  QMAtoms {57:68} end
  ActiveAtoms {57:68} end
  Charge_Total 0           # charge of the full system.
  Mult_Total 14           # multiplicity of the full system.
end

%rel OneCenter true
end

%scf maxiter 200
  shift shift 0.10 erroff 0.1 end
  CNVSOSCF true SOSCFstart 0.001
end

*xyzfile 2 14 6dhfAx12A.xyz
```

### *DLPNO-CCSD(T)/xTB Single Point Calculations*

```
! QM/XTB UKS B3LYP DLPNO-CCSD(T1) ZORA ZORA-def2-TZVP def2-TZVP/C decontractAuxC SARC/J
! NoTrah TightSCF NormalPNO
! moread

%pal nprocs 8 end
%maxcore 30000

%moinp "A1_SP_B3LYPXTB.gbw"

%qmmm
  QMAtoms {57:68} end
  Charge_Total 0
  Mult_Total 14
end

%basis newgto H "ZORA-def2-SVP" end
      NewAuxCGTO H "def2-SVP/C" end
      newgto C "ZORA-def2-SVP" end
      NewAuxCGTO C "def2-SVP/C" end
      newgto Mn "ZORA-def2-TZVPP" end
      NewAuxCGTO Mn "def2-TZVPP/C" end
end

%mdci Maxiter 100
end

*xyzfile 1 14 A1.xyz
```

### *DFT Broken-Symmetry Calculations*

```
! UKS TPSSh RIJCOSX ZORA ZORA-def2-TZVP(-f) SARC/J UNO
! Slowconv DEFGRID2 NoTrah TightSCF
! moread

%pal nprocs 10 end
%maxcore 6000
```

```

%moinp "A1_aaaa.gbw"

%basis NewGTO C "ZORA-def2-SVP" end
      NewGTO H "ZORA-def2-SVP" end
end

%cpcm
  surfacetype vdw_gaussian
  epsilon 6.0
end

%scf maxiter 200
  shift shift 0.10 erroff 0.1 end
  FlipSpin 169,170 FinalMs 0.5
end

*xyzfile 2 14 A1.QMRegion.xyz

```

### ***<sup>55</sup>Mn Hyperfine Coupling Tensors***

```

! UKS TPSSh RIJCOSX ZORA ZORA-def2-TZVP(-f) SARC/J
! NoTrah DefGrid3 Slowconv TightSCF
! moread

```

```

%pal nprocs 10 end
%maxcore 15000

```

```

%moinp "A1_abba.gbw"

```

```

%basis newgto C "ZORA-def2-SVP" end
      newgto H "ZORA-def2-SVP" end
      newgto Mn

```

```

S 1
  1 4331015.6489100000      1.0000000000
S 1
  1 1732406.2595600000      1.0000000000
S 1
  1 692962.5038250000      1.0000000000
S 1
  1 277185.0015300000      1.0000000000
S 1
  1 41550.7698900000      1.0000000000
S 1
  1 9455.9700152000      1.0000000000
S 1
  1 2676.5206482000      1.0000000000
S 1
  1 871.4668753000      1.0000000000
S 1
  1 312.9830642000      1.0000000000
S 1
  1 121.4445405100      1.0000000000
S 1
  1 47.9225988300      1.0000000000
S 1
  1 303.6672316300      1.0000000000
S 1
  1 93.8814031900      1.0000000000
S 1
  1 14.8794212100      1.0000000000
S 1
  1 6.2865200700      -1.0000000000
S 1
  1 9.4858591300      1.0000000000
S 1
  1 1.5698706200      1.0000000000
S 1
  1 0.6590321400      -1.0000000000
S 1
  1 0.1068629200      -1.0000000000
S 1
  1 0.0392674400      -1.0000000000
P 6
  1 1444.7978182000      0.0032493630
  2 342.0655119700      0.0237346473
  3 109.5840089100      0.1067232634

```

```

4      40.7479881700      0.3007617717
5      16.1886265700      0.4790147038
6      6.5484506000      0.2708283465
P 1
1      25.3570864400     -1.0000000000
P 1
1      3.4830168800      1.0000000000
P 1
1      1.3858800900      1.0000000000
P 1
1      0.5255509500     -1.0000000000
P 1
1      0.1276500000      1.0000000000
D 4
1      56.5631891200      0.0192444440
2      16.2787347100      0.1161060412
3      5.6964273900      0.3706567953
4      2.1411147900      0.6570040408
D 1
1      0.7829180200      1.0000000000
D 1
1      0.2595231100      1.0000000000
D 1
1      0.0860000000      1.0000000000
F 1
1      1.3260000000      1.0000000000
end
end

```

```

%method SpecialGridAtoms 25
      SpecialGridIntAcc 11
end

```

```

%rel picturechange true end

```

```

%scf maxiter 200
      shift shift 0.10 erroff 0.1 end
      CNVSOSCF true SOSCFstart 0.001
end

```

```

*xyzfile 2 2 A1.QMRegion.xyz

```

```

%eprnmr
      nuclei = all Mn { aiso, adip, aorb }
end

```

### ***<sup>14</sup>N Hyperfine Coupling Tensors***

```

! UKS TPSSh RIJCOSX ZORA ZORA-def2-TZVP(-f) SARC/J
! NoTrah DefGrid3 Slowconv TightSCF
! moread

```

```

%pal nprocs 10 end
%maxcore 15000

```

```

%moinp "A1_abba.gbw"

```

```

%basis newgto C "ZORA-def2-SVP" end
      newgto H "ZORA-def2-SVP" end
end

```

```

%method SpecialGridAtoms -102
      SpecialGridIntAcc 9
end

```

```

%rel picturechange true end

```

```

%scf maxiter 200
      shift shift 0.10 erroff 0.1 end
      CNVSOSCF true SOSCFstart 0.001
end

```

```

*xyz 2 2
C      -32.81606358789301      30.28761088251150      361.30983037212343
C      -33.64819349639328      31.43246819788671      360.71597926986345
O      -33.04233089349555      32.37744316159161      360.10973068202048

```

```

...
N   -36.39637797714527    37.75964070208878    364.98802961697635 newGTO "EPR-II" end
H   -40.93938916850582    34.68978276710928    364.09894038433413
...
*
%eprnmr
  nuclei = 103 { aiso, adip, aorb, fgrad }
end

```

### ***TD-DFT Calculations of Mn X-Ray Pre-Edge Absorption Spectra***

```

! UKS TPSSh RIJCOSX ZORA ZORA-def2-TZVP(-f) SARC/J CPCM
! NoTrah DefGrid3 Slowconv TightSCF
! PrintBasis PrintM0s moread

```

```

%pal nprocs 10 end
%maxcore 15000

```

```

%moinp "A1_abba.gbw"

```

```

%basis newgto C "ZORA-def2-SVP" end
      newgto H "ZORA-def2-SVP" end
end

```

```

%cpcm
  surfacetype vdw_gaussian
  epsilon 6.0
end

```

```

%tddft NRoots 150
      MaxDim 8
      OrbWin[0]=0,0,-1,-1
      OrbWin[1]=0,0,-1,-1
      DoQuad true
end

```

```

*xyzfile 2 2 A1.QMRegion.xyz

```

## Broken-Symmetry Total Energies

A1\_aaaa: -12623.696020356470  
A1\_aaab: -12623.695992155570  
A1\_aaba: -12623.695754559503  
A1\_aabb: -12623.694744484541  
A1\_abaa: -12623.696423563340  
A1\_abab: -12623.696579136809  
A1\_abba: -12623.697495624656  
A1\_baaa: -12623.696615624282

A2\_aaaa: -12623.231112361276  
A2\_aaab: -12623.231065798996  
A2\_aaba: -12623.230861661585  
A2\_aabb: -12623.229823508897  
A2\_abaa: -12623.231928859101  
A2\_abab: -12623.232093440551  
A2\_abba: -12623.232803980689  
A2\_baaa: -12623.231901326084

B1\_aaaa: -12623.697349493696  
B1\_aaab: -12623.697850517168  
B1\_aaba: -12623.696771192737  
B1\_abaa: -12623.694844791593  
B1\_abba: -12623.696721762217  
B1\_baaa: -12623.695544027962  
B1\_baba: -12623.695544316870  
B1\_bbba: -12623.695431961678

B2\_aaaa: -12623.232452545464  
B2\_aaab: -12623.233058282956  
B2\_aaba: -12623.232061879182  
B2\_abaa: -12623.230175463430  
B2\_abba: -12623.232000206923  
B2\_baaa: -12623.230380141093  
B2\_baba: -12623.230930969143  
B2\_bbba: -12623.230321409774

B3\_aaaa: -12623.205548669890  
B3\_aaab: -12623.207076268252  
B3\_aaba: -12623.210647070171  
B3\_abaa: -12623.207216084587  
B3\_baaa: -12623.204453615706  
B3\_baab: -12623.206206403924  
B3\_abab: -12623.208790884171  
B3\_bbba: -12623.209012675627

C1\_aaaa: -12624.107475514689  
C1\_aaab: -12624.106615605704  
C1\_aaba: -12624.106279355192  
C1\_aabb: -12624.106155107949  
C1\_abaa: -12624.107702411082  
C1\_abab: -12624.106886029955  
C1\_abba: -12624.107835830948  
C1\_baaa: -12624.107687156158

B2\_aaaa: -12623.670727069777  
B2\_aaab: -12623.670146491497  
B2\_aaba: -12623.668750740018  
B2\_aabb: -12623.668943220111  
B2\_abaa: -12623.670856308170  
B2\_abab: -12623.670259601962  
B2\_abba: -12623.670673881943  
B2\_baaa: -12623.670841032519

B3\_aaaa: -12623.676222828066  
B3\_aaab: -12623.675617660072  
B3\_aaba: -12623.674993793184  
B3\_aabb: -12623.674865163957  
B3\_abaa: -12623.676566007372  
B3\_abab: -12623.676006650330  
B3\_abba: -12623.676697302299  
B3\_baaa: -12623.676540606522

B4\_aaaa: -12623.194266999557  
B4\_aaab: -12623.193648369459  
B4\_aaba: -12623.191892057903



B4\_aabb: -12623.192002155833  
B4\_abaa: -12623.194713312296  
B4\_abab: -12623.194124244212  
B4\_abba: -12623.194510637717  
B4\_baaa: -12623.194643375389

D1\_aaaa: -12699.313915408475  
D1\_aaab: -12699.316588063504  
D1\_aaba: -12699.318098345284  
D1\_abaa: -12699.312167086655  
D1\_abab: -12699.315327206981  
D1\_baaa: -12699.315379583479  
D1\_baab: -12699.317854393790  
D1\_bbba: -12699.315164277492

D2\_aaaa: -12699.319609560973  
D2\_aaab: -12699.320584989002  
D2\_aaba: -12699.322007824761  
D2\_aabb: -12699.320879941788  
D2\_abaa: -12699.317827125466  
D2\_abab: -12699.318923333873  
D2\_abba: -12699.320896870617  
D2\_baaa: -12699.319859076842

D3\_aaaa: -12699.315370051121  
D3\_aaab: -12699.316099625112  
D3\_aaba: -12699.315005636316  
D3\_aabb: -12699.314166922721  
D3\_abaa: -12699.316229266014  
D3\_baaa: -12699.315451084189  
D3\_baab: -12699.316624578789  
D3\_baba: -12699.316465253214

D4\_aaaa: -12699.792480381404  
D4\_aaab: -12699.796262124508  
D4\_aaba: -12699.797423689999  
D4\_abaa: -12699.790551350978  
D4\_abab: -12699.794922687999  
D4\_baaa: -12699.793939354609  
D4\_baab: -12699.797358087559  
D4\_bbba: -12699.793473845371

D5\_aaaa: -12699.790800352677  
D5\_aaab: -12699.798389345880  
D5\_aaba: -12699.798704769020  
D5\_abaa: -12699.790198613955  
D5\_abba: -12699.798486352372  
D5\_baaa: -12699.790579628883  
D5\_baba: -12699.797838867169  
D5\_bbba: -12699.790771806385

D6\_aaaa: -12698.806495688748  
D6\_aaab: -12698.808476539887  
D6\_aaba: -12698.807492104392  
D6\_aabb: -12698.805538618648  
D6\_abaa: -12698.805328651541  
D6\_baaa: -12698.806092986049  
D6\_baab: -12698.808168353147  
D6\_baba: -12698.807146771476

D7\_aaaa: -12699.783200982496  
D7\_aaab: -12699.785407407186  
D7\_aaba: -12699.789899616864  
D7\_abaa: -12699.786037773509  
D7\_abab: -12699.787379576335  
D7\_baaa: -12699.782988453268  
D7\_baab: -12699.785406030851  
D7\_bbba: -12699.788238294081

## References

1. D. A. Marchiori, P. H. Oyala, R. J. Debus, T. A. Stich and R. D. Britt, Structural Effects of Ammonia Binding to the  $Mn_4CaO_5$  Cluster of Photosystem II, *J. Phys. Chem. B*, 2018, **122**, 1588-1599.
2. T. Lohmiller, V. Krewald, M. P. Navarro, M. Retegan, L. Rapatskiy, M. M. Nowaczyk, A. Boussac, F. Neese, W. Lubitz, D. A. Pantazis and N. Cox, Structure, ligands and substrate coordination of the oxygen-evolving complex of photosystem II in the  $S_2$  state: a combined EPR and DFT study, *Phys. Chem. Chem. Phys.*, 2014, **16**, 11877-11892.
